# Supplementary material
Source: PubMed Central journal article supplement (PMC3993133)
Supplement: AEM.04272-13_zam999105236so1.pdf [file AEM.04272-13_zam999105236so1.pdf]

# 1 Supplementary material

2 **Table S1: Primers used in construction of *L. johnsonii* mutant strains.**

| Region                                 | ID | Sequence                                   |
|----------------------------------------|----|--------------------------------------------|
| <i>LJ_1826</i> 5' homology 5' primer   | A  | CTACTCCAGAAGAAGTCG                         |
| <i>LJ_1826</i> 5' homology 3' primer   | B  | ATATATGGATCCAAGGGTGAAGGACAAAGC             |
| <i>LJ_1853</i> 3' homology 5' primer   | C  | GGGTTTTGCATTCCAGTC                         |
| <i>LJ_1853</i> 3' homology 3' primer   | D  | ATATATGGTACCTTGCCAAAAGTTGGAGC              |
| <i>LJ_1254- LJ_1255</i> 5' homology 5' | E  | ATATATGAGCTCAATACTCAATGTAAGCGC             |
| <i>LJ_1254- LJ_1255</i> 5' homology 3' | F  | ATATATGGATCCTGATTGCAGGTCCACCTG             |
| <i>LJ_1254- LJ_1255</i> 3' homology 5' | G  | ATATATGAATTCTGATTTAGTAGCTGCTGG             |
| <i>LJ_1254- LJ_1255</i> 3' homology 3' | H  | ATATATGGTACCCAGAACTATGAAGGCTC              |
| <i>LJ_0548- LJ_0549</i> 5' homology 5' | I  | ATATATGAGCTCGCTGCAAATGAAGGGCTAGA           |
| <i>LJ_0548- LJ_0549</i> 5' homology 3' | J  | ATATATGGATCCGCGTTGCTACCTACAATGGC           |
| <i>LJ_0548- LJ_0549</i> 3' homology 5' | K  | ATATATGAATTCTTTAATTGGTCATGCTGCAG           |
| <i>LJ_0548- LJ_0549</i> 3' homology 3' | L  | ATATATGGTACCAGCTCGCCTTCACTACGGAG           |
| <i>LJ_1125</i> term 5'                 | O  | ATATATAAGCTTTGCCAATGGATAACCAGG             |
| <i>LJ_1125</i> term 3'                 | P  | ATATATCTCGAGAATCTCTCTTGGACTTGC             |
| <i>LJ_0045</i> promoter 5'             | R  | ATATATAGATCTCATTATCATAAGGCACCC             |
| <i>LJ_0045</i> promoter 3'             | S  | ATATATGAGCTCGCTAGCGCATGCATTAAACCTCC<br>GTC |
| SphI site before <i>LJ_0548</i>        | T  | ATATATGCATGCAACTCTTGCCATTGTAGG             |
| SphI site before <i>LJ_0549</i>        | U  | ATATATGCATGCAATTACTAGCAATTGTTGG            |
| HindIII site after <i>LJ_0548</i>      | V  | ATATATAAGCTTAATTTTCATGGGTCGTTCTC           |
| HindIII site after <i>LJ_0549</i>      | W  | ATATATAAGCTTGGTTTTAACTTATTTTTGAGCTTG       |

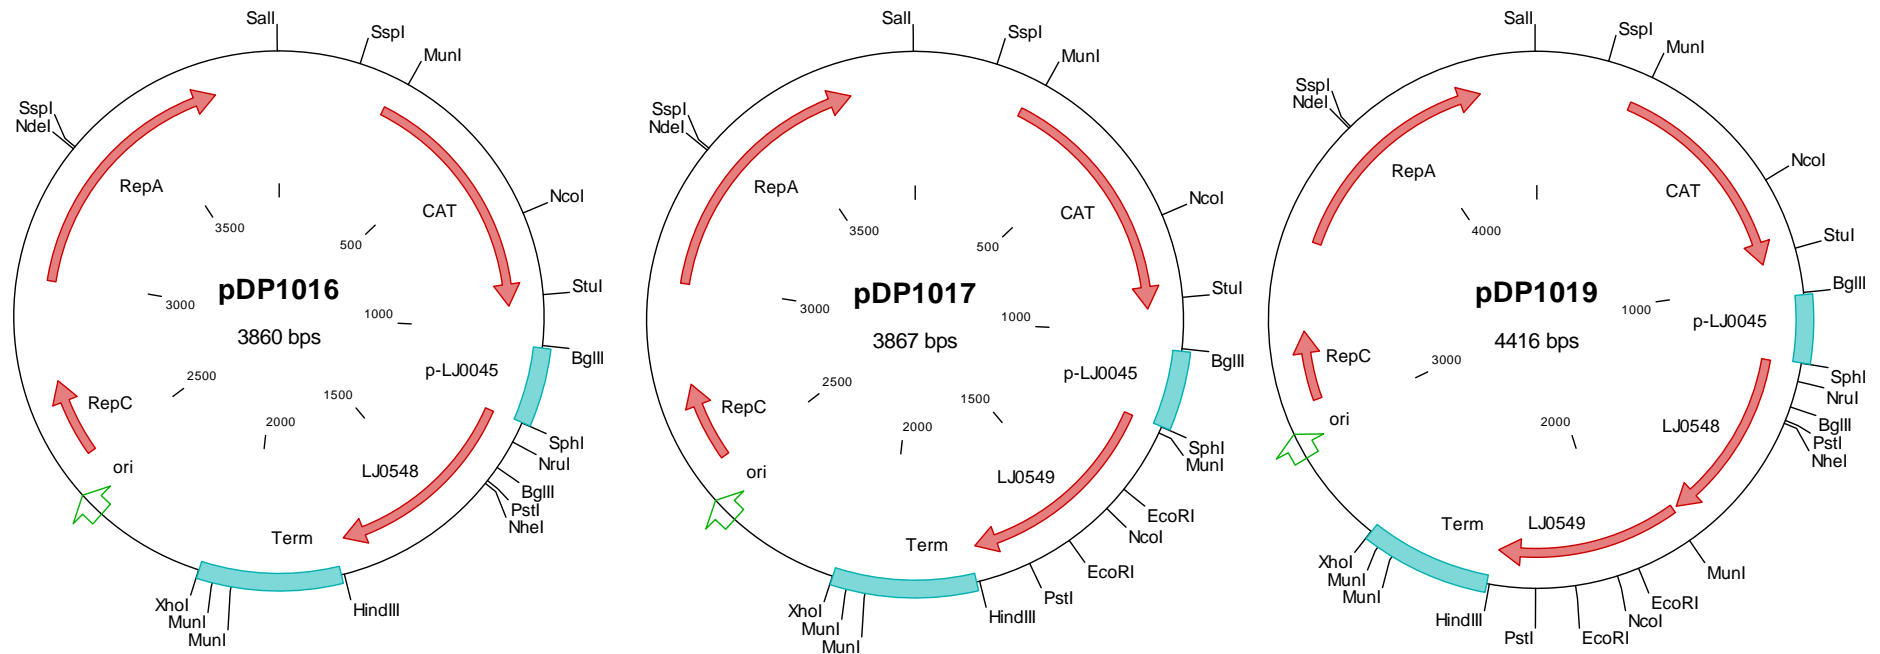

3 **Figure S1: Genetic maps of *LJ\_0548* and/or *LJ\_0549* overexpression plasmids.**

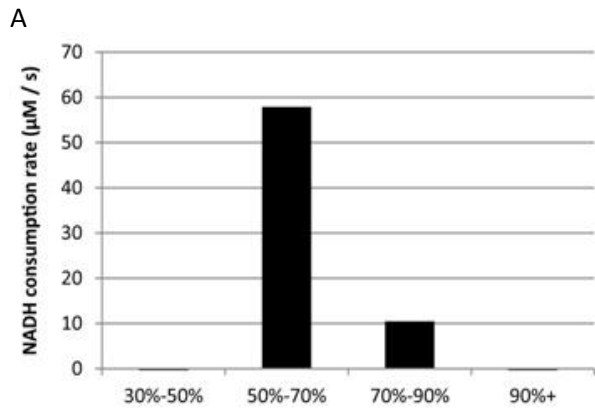

4

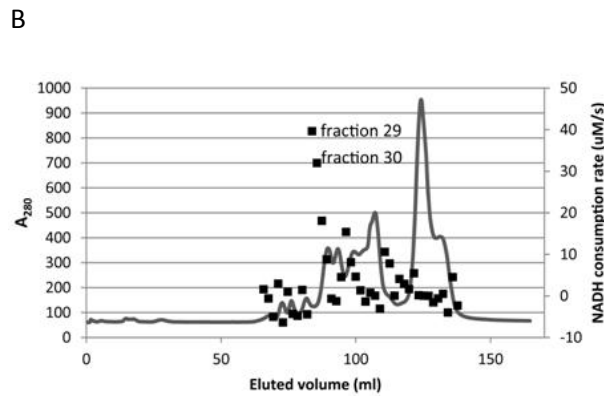

5

6 **Figure S2: Purification of NADH flavin reductase activity in cell free extract of wild type *L. johnsonii*. NADH**  
 7 **consumption rate (in the presence of 250 µM FAD) is determined in fractions obtained during ammonium**  
 8 **sulphate precipitation (panel A). The fraction with highest activity is subsequently used for anion exchange**  
 9 **chromatography. All fractions eluting from the Q column (panel B) are tested for NADH flavin reductase**  
 10 **activity. On the left axis, absorption at 280 nm is shown which is an indicator of protein concentration. On**  
 11 **the right axis, NADH consumption rate is shown in the eluting fractions.**

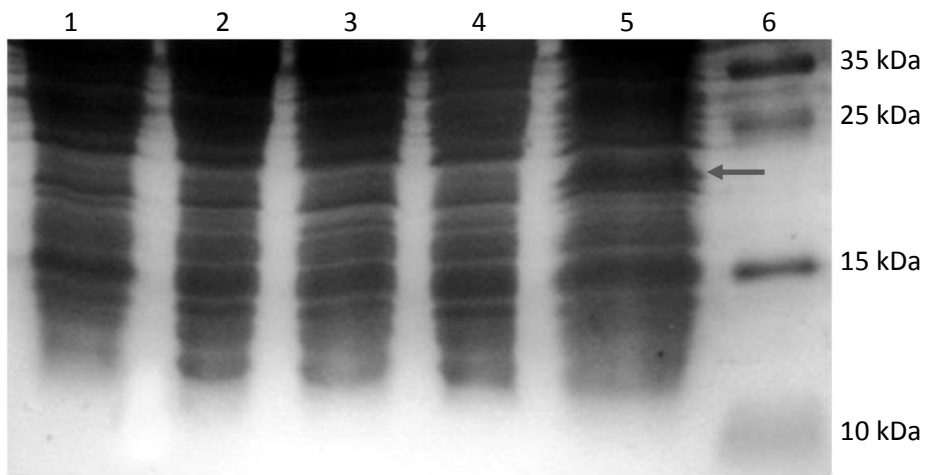

13 **Figure S3: SDS gel of cell free extracts of *L. johnsonii* NCC 533 (wt, lane 1), NCC 9359 + pDP 1016 ( $\Delta nfr$  +**  
14 ***LJ\_0548*, lane 2), NCC 9359 + pDP 1017 ( $\Delta nfr$  + *LJ\_0549*, lane 3), NCC 9359 ( $\Delta nfr$ , lane 4), NCC 9359 + pDP**  
15 **1019 ( $\Delta nfr$  + *LJ\_0548-LJ\_0549*, lane 5), PageRuler™ marker (lane 6).**

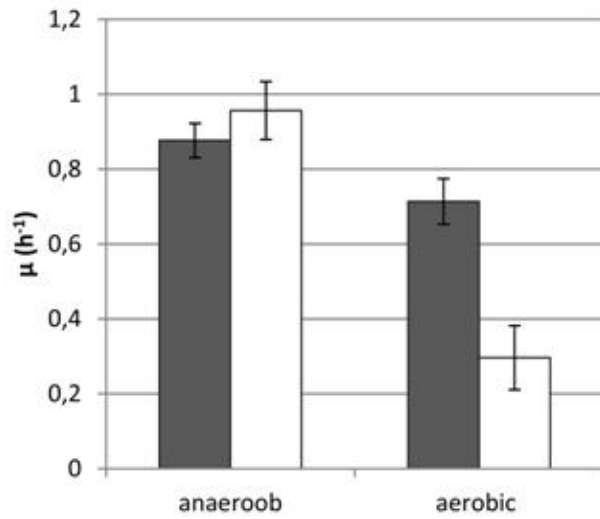

16

17 **Figure S4: Growth rate of *L. johnsonii* NCC 533 (grey bars) and its *nfr*-deletion derivative NCC 9359 (white**  
18 **bars) in MRS-medium in stirred pH controlled sparged with 750 ml/min of N<sub>2</sub> + 5% CO<sub>2</sub> (anaerobic) or N<sub>2</sub>+**  
19 **20% O<sub>2</sub>+ 5% CO<sub>2</sub> (aerobic). Growth rates were determined as explained in Materials & Methods. Data are**  
20 **average of triplicate experiments ± standard deviation.**

```

L. johnsonii LJ_0549      ----MKLLAIVGTNADFSYNRFLDQFMAKRYKDQAEIEVY-EIADLPRFK 45
L. johnsonii LJ_0548      ----MKLFAIVGSNADHSYNRDLLNFIKKHFTDRYDIELG-EVKDLPMFK 45
E. coli K12 ChrR          MSEKLQVVTLLGSLRKGSEFNGMVARTLPKIAPASMEVNALPSIADIPLYD 50
                          :::::.*: . *:* : . : *      :::  .. *:* ..

L. johnsonii LJ_0549      KEAQP----DSKVEEFKNKIREADGVIFATPEYDHGIPSALKSAMWTGS 91
L. johnsonii LJ_0548      EGVKE----PAAVASFAKKVADADAVLISTPEQQHSVPSSLKSALEWLSS 91
E. coli K12 ChrR          ADVQEEGFPATVEALAEQIRQADGVVIVTPEYNYSVPGGLKNAIDWLSR 100
                          .:      : * : ::: :**.*:: *** ::.:*..**.*:* .

L. johnsonii LJ_0549      HAQGNADVMMKMPAMVLGTSYGIQGASRAQEEMREIILSPDQSANVLPGN 141
L. johnsonii LJ_0548      AEHP----FKDKPVVIVGTSVLPQGSARGQSHLKLVLSSPGFGAKVFNGD 137
E. coli K12 ChrR          LPDQP---LAGKPVLIQTSSMGVIGGARCQYHLRQILVFLD--AMVMNKP 145
                          .      : **.: : *  *.* * .: : * . * *:

L. johnsonii LJ_0549      EVLIGHAADKFDKNTGDLDDQETIHAIDLAFNNFVKFVEQAQK 184
L. johnsonii LJ_0548      EFMMGTAPEQFDENGN--LPAGTVKFLDHHFFDEFDSFYAEVSK 178
E. coli K12 ChrR          EFMGGVIQNKVDPQTGEVIDQGTLDHLTGQLTAFGEFIQRVKI 188
                          *.: *  :.:* : . : *.: : : * .* ...

```

21

22 **Figure S5: ClustalW2 comparison of LJ\_0548 / LJ\_0549 to chromate reductase (ChrR) from E. coli.**

23 **Highlighted in grey are the residues that constitute the flavin binding site, highlighted in yellow are the**

24 **similarities in these residues in the L. johnsonii genes.**
